# Supplementary material for: Germline genes hypomethylation and expression define a molecular signature in peripheral blood of ICF patients: implications for diagnosis and etiology
Source: PubMed Central journal article supplement (PMC4022050; doi:10.1186/1750-1172-9-56), 2014-04-17
Supplement: 1750-1172-9-56-S8.pdf [file 1750-1172-9-56-S8.pdf]

| DNA Methylation levels in control samples: $\Delta CT_m$ ( $CT_m$ <i>Acil</i> digest) |                     |                     |                    |                     |                     |                     |                     |
|---------------------------------------------------------------------------------------|---------------------|---------------------|--------------------|---------------------|---------------------|---------------------|---------------------|
| Sample                                                                                | MAEL                | SYCE1               | SLC25A31           | SYCP1               | TEX11               | TEX12               | DDX4                |
| WB1                                                                                   | 0.25 (23.43)        | 2.38 (26.78)        | 0.11 (23.90)       | 2.17 (25.75)        | 0.14 (25.40)        | 0.11 (26.54)        | 0.16 (23.66)        |
| WB2                                                                                   | 0.14 (23.53)        | 2.32 (26.61)        | 0.06 (23.42)       | 2.30 (26.39)        | 0.16 (24.21)        | 0.16 (26.51)        | 0.12 (23.63)        |
| WB3                                                                                   | 0.23 (23.45)        | 2.35 (26.60)        | 0.09 (23.79)       | 2.16 (26.39)        | 0.25 (24.15)        | 0.22 (26.96)        | 0.08 (24.75)        |
| WB4                                                                                   | 0.23 (23.99)        | 2.24 (27.28)        | 0.14 (23.93)       | 2.10 (25.57)        | 0.30 (24.10)        | 0.10 (26.23)        | 0.18 (23.60)        |
| WB5                                                                                   | 0.28 (23.08)        | 2.48 (26.89)        | 0.11 (23.95)       | 2.35 (26.31)        | 0.24 (23.83)        | 0.18 (27.05)        | 0.11 (23.74)        |
| WB6                                                                                   | 0.15 (23.54)        | 2.16 (26.54)        | 0.12 (24.09)       | 2.13 (26.56)        | 0.22 (24.34)        | 0.12 (26.55)        | 0.13 (23.76)        |
| DNA Methylation levels in ICF1 : $\Delta CT_m$ ( $CT_m$ <i>Acil</i> digest)           |                     |                     |                    |                     |                     |                     |                     |
| pG                                                                                    | 2.40 (26.20)        | 4.84 (29.60)        | 1.38 (25.22)       | 4.88 (28.79)        | 0.05 (24.19)        | 0.06 (26.61)        | 0.05 (23.70)        |
| pR                                                                                    | 1.01 (26.31)        | 3.5 (28.23)         | 1.26 (25.97)       | 6.01 (31.63)        | 0.98 (25.55)        | 0.13 (28.01)        | 0.09 (23.83)        |
| pW                                                                                    | 0.92 (24.19)        | 5.81 (30.00)        | 2.07 (25.72)       | 4.46 (27.17)        | 1.25 (25.13)        | 0.54 (27.05)        | 0.07 (24.11)        |
| pH                                                                                    | 0.52 (23.50)        | 3.92 (27.98)        | 0.50 (23.89)       | 3.79 (27.00)        | 0.18 (23.79)        | 0.12 (26.41)        | 0.15 (23.70)        |
| P1                                                                                    | 0.62 (25.30)        | 2.85 (28.16)        | 0.64 (24.79)       | 2.97 (27.77)        | 0.91 (24.96)        | 0.13 (27.97)        | 0.06 (24.21)        |
| pY                                                                                    | 2.02 (26.87)        | 3.71 (29.05)        | 0.25 (24.60)       | 2.54 (26.09)        | 0.11 (24.90)        | 0.13 (27.00)        | 0.05 (24.34)        |
| P2                                                                                    | 3.00 (27.38)        | 3.86 (29.00)        | 2.37 (26.76)       | 5.71 (29.95)        | 0.17 (24.88)        | 0.04 (27.14)        | 0.03 (24.09)        |
| P3                                                                                    | 1.26 (25.31)        | 5.25 (30.10)        | 1.23 (25.65)       | 5.74 (29.92)        | 1.04 (24.60)        | 0.14 (27.14)        | 0.08 (24.02)        |
| <b>P4</b>                                                                             | <b>1.09 (25.18)</b> | <b>5.69 (30.41)</b> | <b>0.9 (25.30)</b> | <b>4.65 (29.11)</b> | <b>1.27 (25.07)</b> | <b>0.15 (27.63)</b> | <b>0.18 (24.38)</b> |
| P5                                                                                    | 1.06 (25.11)        | 3.69 (29.13)        | 0.48 (24.80)       | 4.28 (28.55)        | 0.37 (25.22)        | 0.11 (27.58)        | 0.10 (24.51)        |
| DNA Methylation levels in ICF2 : $\Delta CT_m$ ( $CT_m$ <i>Acil</i> digest)           |                     |                     |                    |                     |                     |                     |                     |
| P6                                                                                    | 0.27 (23.80)        | 2.11 (26.93)        | 0.19 (23.84)       | 2.79 (26.87)        | 0.57 (25.04)        | 0.14 (26.74)        | 0.16 (24.00)        |
| pD                                                                                    | 0.23 (24.09)        | 2.07 (28.27)        | 0.18 (24.40)       | 2.97 (27.40)        | 0.54 (25.26)        | 0.35 (28.07)        | 0.11 (23.92)        |
| pV                                                                                    | 0.26 (24.17)        | 2.03 (26.72)        | 0.30 (24.26)       | 3.39 (27.52)        | 0.65 (25.11)        | 0.04 (26.65)        | 0.09 (23.91)        |
| P7                                                                                    | 0.17 (24.30)        | 1.97 (26.74)        | 0.12 (24.62)       | 2.43 (26.76)        | 0.13 (24.91)        | 0.09 (27.71)        | 0.10 (24.20)        |
| P8                                                                                    | 0.15 (24.14)        | 2.52 (25.73)        | 0.24 (24.37)       | 2.75 (26.57)        | 1.20 (25.35)        | 0.04 (26.97)        | 0.11 (24.47)        |
| DNA Methylation levels in ICFX : $\Delta CT_m$ ( $CT_m$ <i>Acil</i> digest)           |                     |                     |                    |                     |                     |                     |                     |
| pC                                                                                    | 0.11 (23.97)        | 2.27 (27.00)        | 0.07 (24.44)       | 2.63 (26.79)        | 1.25 (24.96)        | 0.10 (27.22)        | 0.06 (24.19)        |
| pS                                                                                    | 0.13 (23.96)        | 2.40 (26.40)        | 0.10 (24.00)       | 2.05 (25.63)        | 1.23 (24.48)        | 0.08 (27.52)        | 0.27 (24.17)        |
| pN                                                                                    | 4.72 (28.86)        | 4.51 (29.10)        | 1.24 (25.19)       | 6.26 (29.93)        | 1.40 (24.58)        | 0.31 (27.31)        | 0.25 (23.53)        |

**Additional File 8A. Analysis of methylation at germline gene promoters in whole blood.** Genomic DNA was extracted from whole blood of healthy donors (CTL), ICF1, ICF2 and ICFX patients. Methylation analysis levels were assessed by Methylation-Sensitive Restriction Assay, followed by qRT-PCR amplification of the *Acil* digested products using primers flanking at least two *Acil* sites within the promoter CpG island. A non-cutter *NcoI* control digest served to normalize data that are presented in Figure 2. For each sample, the differences in cycle threshold ( $\Delta CT$ ) between *Acil* and *NcoI* digests are indicated as an average value of 3 independent experiments.  $\Delta CT_m = CT_{m_{Acil\ digest}} - CT_{m_{NcoI\ digest}}$ . The raw cycle threshold (CT) values are indicated into brackets. The  $\Delta CT_m$  values obtained for diagnosis from of the young child diagnosed in Figure 3 are indicated in red.

| DNA Methylation in control cell lines: $\Delta CT$ ( $CT_{AciI}$ ) |              |              |              |              |              |              |              |
|--------------------------------------------------------------------|--------------|--------------|--------------|--------------|--------------|--------------|--------------|
| Cell line                                                          | MAEL         | SYCE1        | SLC25A31     | SYCP1        | TEX11        | TEX12        | DDX4         |
| IMR90                                                              | 0.1 (24.93)  | 3.03 (27.95) | 0.23 (24.95) | 0.59 (24.46) | 0.37 (25.79) | 0.13 (28.82) | 0.25 (25.77) |
| MCF-7                                                              | 0.15 (24.64) | 3.04 (29.92) | 0.26 (25.46) | 0.53 (23.78) | 0.55 (25.63) | 0.16 (29.51) | 0.23 (25.68) |
| MCF-7 AZA                                                          | 1.73 (27.24) | 3.63 (31.23) | 1.26 (27.13) | 1.78 (2.25)  | 2.46 (28.27) | 1.41 (32.05) | 1.51 (27.58) |

**Additional File 8B. Raw PCR data used to build DNA methylation histograms shown in Additional File 5.**

Genomic DNA was extracted from IMR90 fibroblasts, breast cancer cell line MCF-7 treated or not with the demethylating agent 5-azacytidine. For each sample, the differences in cycle threshold ( $\Delta CT$ ) between *AciI* and *NcoI* digests are indicated as indicated above (panel 8A). The raw cycle threshold ( $CT_{AciI}$ ) values obtained after *AciI* digests are indicated into brackets.

| Statistical data for DNA methylation analysis |                 |             |             |                     |                 |                 |             |                     |              |             |             |
|-----------------------------------------------|-----------------|-------------|-------------|---------------------|-----------------|-----------------|-------------|---------------------|--------------|-------------|-------------|
| <b>MAEL</b>                                   |                 |             |             | <b>SLC25A31</b>     |                 |                 |             | <b>TEX12</b>        |              |             |             |
| Median $\Delta$ CTm                           |                 |             |             | Median $\Delta$ CTm |                 |                 |             | Median $\Delta$ CTm |              |             |             |
| CTL                                           | ICF1            | ICF2        | ICFX        | CTL                 | ICF1            | ICF2            | ICFX        | CTL                 | ICF1         | ICF2        | ICFX        |
| 0.23                                          | 1.08            | 0.23        | 0.13        | 0.11                | 1.07            | 0.19            | 0.1         | 0.14                | 0.13         | 0.09        | 0.1         |
| Standard error                                |                 |             |             | Standard error      |                 |                 |             | Standard error      |              |             |             |
| <b>0.06</b>                                   | <b>0.81</b>     | <b>0.05</b> | <b>2.66</b> | <b>0.03</b>         | <b>0.7</b>      | <b>0.07</b>     | <b>0.67</b> | <b>0.05</b>         | <b>0.14</b>  | <b>0.13</b> | <b>0.13</b> |
| p value                                       |                 |             |             | p value             |                 |                 |             | p value             |              |             |             |
| CTL vs ICF1                                   | ICF1 vs ICF2    | ICF2 vs CTL | ICFX vs CTL | CTL vs ICF1         | ICF1 vs ICF2    | ICF2 vs CTL     | ICFX vs CTL | CTL vs ICF1         | ICF1 vs ICF2 | ICF2 vs CTL | ICFX vs CTL |
| <b>3,58E-03</b>                               | <b>7,41E-03</b> | <b>0.94</b> | <b>0.19</b> | <b>3,78E-03</b>     | <b>0.01</b>     | <b>8,28E-03</b> | <b>0.19</b> | <b>0.91</b>         | <b>0.76</b>  | <b>0.78</b> | <b>0.8</b>  |
| <b>SYCE1</b>                                  |                 |             |             | <b>SYCP1</b>        |                 |                 |             | <b>DDX4</b>         |              |             |             |
| Median $\Delta$ CTm                           |                 |             |             | Median $\Delta$ CTm |                 |                 |             | Median $\Delta$ CTm |              |             |             |
| CTL                                           | ICF1            | ICF2        | ICFX        | CTL                 | ICF1            | ICF2            | ICFX        | CTL                 | ICF1         | ICF2        | ICFX        |
| 2.34                                          | 3.89            | 2.07        | 2.4         | 2.17                | 4.56            | 2.79            | 2.63        | 0.13                | 0.08         | 0.11        | 0.25        |
| Standard error                                |                 |             |             | Standard error      |                 |                 |             | Standard error      |              |             |             |
| 0.11                                          | 1.01            | 0.22        | 1.26        | 0.1                 | 1.16            | 0.35            | 2.28        | 0.04                | 0.05         | 0.03        | 0.12        |
| p value                                       |                 |             |             | p value             |                 |                 |             | p value             |              |             |             |
| CTL vs ICF1                                   | ICF1 vs ICF2    | ICF2 vs CTL | ICFX vs CTL | CTL vs ICF1         | ICF1 vs ICF2    | ICF2 vs CTL     | ICFX vs CTL | CTL vs ICF1         | ICF1 vs ICF2 | ICF2 vs CTL | ICFX vs CTL |
| <b>3,18E-04</b>                               | <b>4,43E-04</b> | <b>0.11</b> | <b>0.17</b> | <b>3,01E-04</b>     | <b>9,74E-03</b> | <b>1,58E-03</b> | <b>0.14</b> | <b>0.07</b>         | <b>0.24</b>  | <b>0.43</b> | <b>0.24</b> |

**Additional File 8C. Statistical analysis of germline genes methylation profiles in whole blood of patients.** The median values of  $\Delta$ CTm shown in Additional File 8A and standard errors are indicated for each germline gene tested. Hypomethylation of *MAEL*, *SYCE1*, *SLC25A31*, *SYCP1* in ICF1 compared to CTL donors or ICF2 subjects is strongly significant ( $p < 0.01$ ) and is highlighted in blue.

| Statistical data for DNA methylation at TEX11 |                 |                 |       |                 |        |        |
|-----------------------------------------------|-----------------|-----------------|-------|-----------------|--------|--------|
| Median $\Delta$ CTm                           |                 |                 |       |                 |        |        |
| CTL M                                         | ICF1 M          | ICF2 M          | CTL F | ICF1 F          | ICF2 F | ICFX F |
| 0.2                                           | 0.17            | 0.55            | 0.24  | 1,04            | 1.20   | 1,25   |
| Standard Errors                               |                 |                 |       |                 |        |        |
| 0.07                                          | 0.12            | 0.23            | 0.02  | 0,16            | NA     | 0,09   |
| p value                                       |                 |                 |       |                 |        |        |
| ICF1 M vs CTL M                               | ICF1 F vs CTL F | ICF2 M vs CTL M |       | ICFX F vs CTL F |        |        |
| <b>0.64</b>                                   | <b>2,18E-04</b> | <b>0.08</b>     |       | <b>6,32E-04</b> |        |        |

| Statistical data for DNA methylation at TEX11 within ICF2 |             |             |             |        |
|-----------------------------------------------------------|-------------|-------------|-------------|--------|
| Median $\Delta$ CTm                                       |             |             |             |        |
| P6 (M)                                                    | pD (M)      | pV (M)      | P7 (M)      | P8 (F) |
| 0.63                                                      | 0.65        | 0.57        | 0.13        | 1.14   |
| Standard Errors                                           |             |             |             |        |
| 0.31                                                      | 0.09        | 0.07        | 0.17        | 0.42   |
| p value female vs male                                    |             |             |             |        |
| P8 vs P6                                                  | P8 vs pD    | P8 vs PV    | P8 vs P7    |        |
| <b>0.08</b>                                               | <b>0.08</b> | <b>0.04</b> | <b>0.03</b> |        |

**Additional File 8D. Statistical analysis of TEX11 methylation in whole blood.**

Left panel) The median and standard errors have been calculated in male (M) and female (F) healthy subjects (CTL), ICF1, ICF2 and ICFX patients. Hypomethylation of TEX11 in female versus male in healthy subjects and ICF patients was compared. Hypomethylation of TEX11 in female ICF1 and ICFX is strongly significant ( $p < 0.01$ ) and is highlighted in blue. Right panel) Statistical significance of TEX11 hypomethylation among ICF2 patients was analyzed separately (only one female patient). Hypomethylation in the female ICF2 patient is significantly higher than in male pV and P7, and to a lesser extent P6 and pD, male patients ( $p < 0.05$ ) and is highlighted in blue. NA; not applicable (only one patient in this category).
