# Supplementary material for: Germline genes hypomethylation and expression define a molecular signature in peripheral blood of ICF patients: implications for diagnosis and etiology
Source: PubMed Central journal article supplement (PMC4022050; doi:10.1186/1750-1172-9-56), 2014-04-17
Supplement: 1750-1172-9-56-S10.pdf [file 1750-1172-9-56-S10.pdf]

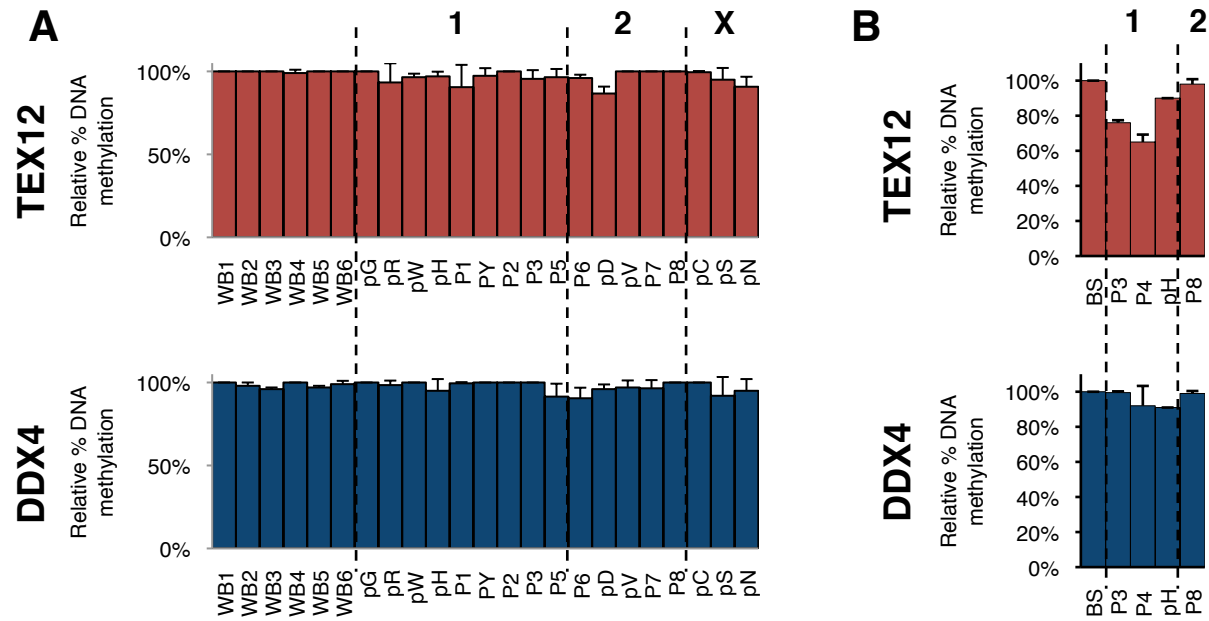

**Additional File 10. Analysis of relative promoter methylation at TEX12 and DDX4 germline genes in whole blood and buccal swabs of ICF patients.** Methylation analysis in whole blood (A) and buccal swabs (B) was assessed as in Figure 2. Error bars represent standard error. WB, Control whole blood from healthy donors; BS, control buccal swab.
