# Supplementary material for: Germline genes hypomethylation and expression define a molecular signature in peripheral blood of ICF patients: implications for diagnosis and etiology
Source: Orphanet J Rare Dis. 2014 Apr 17;9:56. doi: 10.1186/1750-1172-9-56 (PMC4022050; doi:10.1186/1750-1172-9-56)
Supplement: Additional file 4 — Southern blot analysis of DNA methylation at centromeric and juxta-centromeric regions of ICF patients. [file 1750-1172-9-56-S4.pdf]

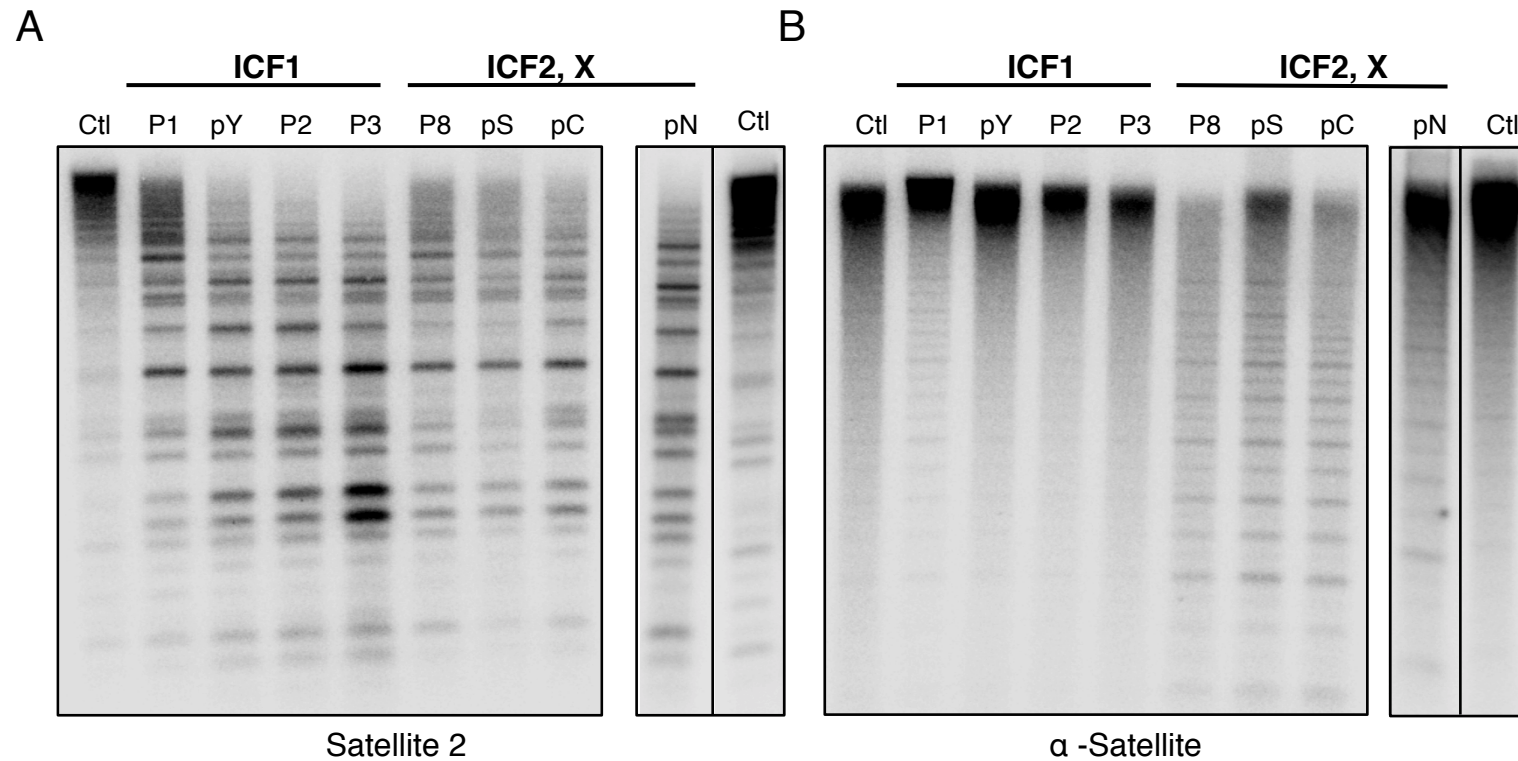

**Additional File 4. DNA methylation patterns at Satellite 2 and α-Satellite repeats in whole blood from ICF patients.** Genomic DNA from control blood (Ctl), ICF1 patients (P1, pY, P2, P3), ICF2 patient (P8) or ICFX patients (pS and pC) was digested by methylation-sensitive enzymes BstBI (A) or HhaI (B) and subjected to Southern blot analysis using radiolabeled probes complementary to Satellite 2 (A) or α-Satellite (B) repeats. Thin black lines separate lanes that were run on the same gel but were not contiguous (right panels, samples pN and its control lane).
